# Supplementary material for: Characterisation of the semi-volatile component of Dissolved Organic Matter by Thermal Desorption – Proton Transfer Reaction – Mass Spectrometry
Source: PubMed Central journal article supplement (PMC5698430; doi:10.1038/s41598-017-16256-x), 2017-11-21

Characterisation of the semi-volatile component of Dissolved Organic Matter by Thermal Desorption – Proton Transfer Reaction – Mass Spectrometry

Dušan Materić, Mike Peacock, Matthew Kent, Sarah Cook, Vincent Gauci, Thomas Röckmann and Rupert Holzinger

Table S1. List of analysed samples. Dilution 1:4 applied for Kalimantan samples before all the experiments

| RN | Samples         | Type     | Location | DOC (mg/L) | SVOC DOM [ug C/L] | SVOC DOM % | Group |
|----|-----------------|----------|----------|------------|-------------------|------------|-------|
| 1  | F1.1 W54        | Forest   | Malaysia | 64.94      | 158.83            | 0.24       | SI    |
| 2  | F1.2 W54        | Forest   | Malaysia | 62.65      | 107.48            | 0.17       | SI    |
| 3  | F1.3 W54        | Forest   | Malaysia | 66.56      | 80.47             | 0.12       | SI    |
| 4  | SE1 W54         | Oil Palm | Malaysia | 58.84      | 166.11            | 0.28       | SOP   |
| 5  | SE3 W54         | Oil Palm | Malaysia | 59.09      | 473.17            | 0.80       | SOP   |
| 6  | SE4 W54         | Oil Palm | Malaysia | 59.81      | 418.76            | 0.70       | SOP   |
| 7  | SA4.1 W54       | Oil Palm | Malaysia | 40.63      | 147.84            | 0.36       | SOP   |
| 8  | SA4.2 W54       | Oil Palm | Malaysia | 39.27      | 153.29            | 0.39       | SOP   |
| 9  | SA4.4 W54       | Oil Palm | Malaysia | 37.01      | 718.41            | 1.94       | SOP   |
| 10 | F1.1 W45        | Forest   | Malaysia | 52.63      | 110.02            | 0.21       | SI    |
| 11 | F1.2 W45        | Forest   | Malaysia | 52.53      | 173.86            | 0.33       | SI    |
| 12 | F1.3 W45        | Forest   | Malaysia | 53.21      | 143.14            | 0.27       | SI    |
| 13 | SE1 W45         | Oil Palm | Malaysia | 45.14      | 174.31            | 0.39       | SOP   |
| 14 | SE3 W45         | Oil Palm | Malaysia | 44.27      | 292.07            | 0.66       | SOP   |
| 15 | SE4 W45         | Oil Palm | Malaysia | 47.86      | 806.23            | 1.68       | SOP   |
| 16 | SA4.1 W45       | Oil Palm | Malaysia | 38.46      | 198.89            | 0.52       | SOP   |
| 17 | SA4.2 W45       | Oil Palm | Malaysia | 38.9       | 181.25            | 0.47       | SOP   |
| 18 | SA4.3 W45       | Oil Palm | Malaysia | 40.44      | 178.33            | 0.44       | SOP   |
| 19 | F1.1 W41        | Forest   | Malaysia | 92.57      | 347.73            | 0.38       | SI    |
| 20 | F1.2 W41        | Forest   | Malaysia | 95.75      | 418.76            | 0.44       | SI    |
| 21 | F1.3 W41        | Forest   | Malaysia | 93.26      | 369.17            | 0.40       | SI    |
| 22 | SE1 W41         | Oil Palm | Malaysia | 53.38      | 260.65            | 0.49       | SOP   |
| 23 | SE3 W41         | Oil Palm | Malaysia | 54         | 332.09            | 0.61       | SOP   |
| 24 | SE4 W41         | Oil Palm | Malaysia | 60.31      | 799.62            | 1.33       | SOP   |
| 25 | SA4.2 W41       | Oil Palm | Malaysia | 46.32      | 339.24            | 0.73       | SOP   |
| 26 | SA4.3 W41       | Oil Palm | Malaysia | 43.48      | 370.96            | 0.85       | SOP   |
| 27 | SA4.4 W41       | Oil Palm | Malaysia | 46.33      | 618.61            | 1.34       | SOP   |
| 28 | 1107 2SEB2-D1   | Intact   | Borneo   | 13.04      | 90.69             | 0.70       | KI    |
| 29 | 1102 2SEB2-D3   | Intact   | Borneo   | 9.96       | 100.19            | 1.01       | KI    |
| 30 | 1059 2SEB2-DA   | Intact   | Borneo   | 10.01      | 64.53             | 0.64       | KI    |
| 31 | 1055 2SEB2-D5   | Intact   | Borneo   | 8.32       | 44.00             | 0.53       | KI    |
| 32 | 1104 2SEB2-D2   | Intact   | Borneo   | 10.75      | 63.88             | 0.59       | KI    |
| 33 | 1211 2KAL1-C18  | Degraded | Borneo   | 7.35       | 41.22             | 0.56       | KD    |
| 34 | 1120 2KAL1-P15  | Degraded | Borneo   | 6.38       | 22.51             | 0.35       | KD    |
| 35 | 1239 2KAL1-P18  | Degraded | Borneo   | 6.14       | 49.67             | 0.81       | KD    |
| 36 | 1033 2KAL1-C15  | Degraded | Borneo   | 5.9        | 13.78             | 0.23       | KD    |
| 37 | 1403 2KAL1-C18E | Degraded | Borneo   | 6.38       | 24.68             | 0.39       | KD    |

## Characterisation of the semi-volatile component of Dissolved Organic Matter by Thermal Desorption – Proton Transfer Reaction – Mass Spectrometry

Dušan Materić, Mike Peacock, Matthew Kent, Sarah Cook, Vincent Gauci, Thomas Röckmann and Rupert Holzinger

Table S2. Ions that showed strong significant difference between intact, selectively logged forest (KI) and deforested, extensively drained land (KD) in Kalimantan, Indonesian Borneo

| m/z     | Chemical formula                                              | mean KI     | mean KD | p value | t value |
|---------|---------------------------------------------------------------|-------------|---------|---------|---------|
| 31.017  | CH <sub>2</sub> OH <sup>+</sup>                               | <b>1.68</b> | 0.26    | 0.0002  | -6.3    |
| 33.033  | CH <sub>4</sub> OH <sup>+</sup>                               | <b>3.72</b> | 1.12    | 0.0001  | -7.3    |
| 42.033  | C <sub>2</sub> H <sub>3</sub> NH <sup>+</sup>                 | <b>0.11</b> | 0.00    | 0.0025  | -6.8    |
| 45.033  | C <sub>2</sub> H <sub>4</sub> OH <sup>+</sup>                 | <b>4.28</b> | 0.00    | 0.0012  | -8.2    |
| 47.013  | CH <sub>2</sub> O <sub>2</sub> H <sup>+</sup>                 | <b>3.94</b> | 0.00    | 0.0006  | -9.8    |
| 51.043  | ?                                                             | <b>0.28</b> | 0.08    | 0.0002  | -6.3    |
| 58.03   | C <sub>2</sub> H <sub>3</sub> ONH <sup>+</sup>                | <b>0.06</b> | 0.00    | 0.0048  | -5.7    |
| 60.045  | C <sub>2</sub> H <sub>5</sub> ONH <sup>+</sup>                | <b>0.28</b> | 0.03    | 0.0022  | -4.4    |
| 65.023  | CH <sub>4</sub> O <sub>3</sub> H <sup>+</sup>                 | <b>0.46</b> | 0.00    | 0.0007  | -9.4    |
| 67.054  | C <sub>5</sub> H <sub>6</sub> H <sup>+</sup>                  | <b>0.06</b> | 0.01    | 0.0020  | -4.5    |
| 69.034  | C <sub>4</sub> H <sub>4</sub> OH <sup>+</sup>                 | <b>0.14</b> | 0.02    | 0.0014  | -4.8    |
| 70.072  | 13CC <sub>4</sub> H <sub>8</sub> H <sup>+</sup>               | <b>0.11</b> | 0.02    | 0.0038  | -4.0    |
| 85.064  | C <sub>5</sub> H <sub>8</sub> OH <sup>+</sup>                 | <b>0.40</b> | 0.18    | 0.0001  | -7.1    |
| 89.058  | C <sub>4</sub> H <sub>8</sub> O <sub>2</sub> H <sup>+</sup>   | <b>0.27</b> | 0.17    | 0.0022  | -4.4    |
| 95.085  | C <sub>7</sub> H <sub>10</sub> H <sup>+</sup>                 | <b>0.16</b> | 0.07    | 0.0037  | -4.0    |
| 97.064  | C <sub>6</sub> H <sub>8</sub> OH <sup>+</sup>                 | <b>0.30</b> | 0.15    | 0.0035  | -4.1    |
| 97.1    | C <sub>7</sub> H <sub>12</sub> H <sup>+</sup>                 | <b>0.11</b> | 0.02    | 0.0014  | -4.8    |
| 99.079  | C <sub>6</sub> H <sub>10</sub> OH <sup>+</sup>                | <b>0.24</b> | 0.12    | 0.0007  | -5.3    |
| 101.058 | C <sub>5</sub> H <sub>8</sub> O <sub>2</sub> H <sup>+</sup>   | <b>0.76</b> | 0.45    | 0.0003  | -6.1    |
| 109.1   | C <sub>8</sub> H <sub>12</sub> H <sup>+</sup>                 | <b>0.41</b> | 0.23    | 0.0036  | -4.1    |
| 113.058 | C <sub>6</sub> H <sub>8</sub> O <sub>2</sub> H <sup>+</sup>   | <b>0.43</b> | 0.22    | 0.0016  | -4.7    |
| 117.02  | C <sub>4</sub> H <sub>4</sub> O <sub>4</sub> H <sup>+</sup>   | <b>0.10</b> | 0.03    | 0.0038  | -4.0    |
| 121.064 | C <sub>8</sub> H <sub>8</sub> OH <sup>+</sup>                 | <b>0.33</b> | 0.22    | 0.0030  | -4.2    |
| 123.114 | C <sub>9</sub> H <sub>14</sub> H <sup>+</sup>                 | <b>0.17</b> | 0.10    | 0.0007  | -5.4    |
| 127.074 | C <sub>7</sub> H <sub>10</sub> O <sub>2</sub> H <sup>+</sup>  | <b>0.18</b> | 0.12    | 0.0007  | -5.4    |
| 127.108 | C <sub>8</sub> H <sub>14</sub> OH <sup>+</sup>                | <b>0.20</b> | 0.12    | 0.0002  | -6.7    |
| 129.055 | C <sub>6</sub> H <sub>8</sub> O <sub>3</sub> H <sup>+</sup>   | <b>0.07</b> | 0.01    | 0.0011  | -4.9    |
| 135.045 | C <sub>6</sub> H <sub>8</sub> O <sub>3</sub> H <sup>+</sup>   | <b>0.05</b> | 0.01    | 0.0034  | -4.1    |
| 135.101 | C <sub>6</sub> H <sub>14</sub> O <sub>3</sub> H <sup>+</sup>  | <b>0.08</b> | 0.00    | 0.0127  | -4.3    |
| 141.09  | C <sub>8</sub> H <sub>12</sub> O <sub>2</sub> H <sup>+</sup>  | <b>0.31</b> | 0.19    | 0.0015  | -4.7    |
| 143.104 | C <sub>8</sub> H <sub>12</sub> O <sub>2</sub> H <sup>+</sup>  | <b>0.26</b> | 0.15    | 0.0001  | -6.9    |
| 153.089 | C <sub>9</sub> H <sub>12</sub> O <sub>2</sub> H <sup>+</sup>  | <b>0.16</b> | 0.09    | 0.0035  | -4.1    |
| 155.098 | C <sub>9</sub> H <sub>12</sub> O <sub>2</sub> H <sup>+</sup>  | <b>0.21</b> | 0.13    | 0.0012  | -4.9    |
| 171.13  | C <sub>10</sub> H <sub>18</sub> O <sub>2</sub> H <sup>+</sup> | <b>0.11</b> | 0.07    | 0.0019  | -4.5    |
| 183.129 | C <sub>7</sub> H <sub>18</sub> O <sub>5</sub> H <sup>+</sup>  | <b>0.07</b> | 0.04    | 0.0003  | -6.2    |
| 193.136 | C <sub>9</sub> H <sub>20</sub> O <sub>4</sub> H <sup>+</sup>  | <b>0.06</b> | 0.03    | 0.0023  | -4.4    |
| 197.144 | C <sub>12</sub> H <sub>20</sub> O <sub>2</sub> H <sup>+</sup> | <b>0.17</b> | 0.14    | 0.0030  | -4.2    |

## Characterisation of the semi-volatile component of Dissolved Organic Matter by Thermal Desorption – Proton Transfer Reaction – Mass Spectrometry

Dušan Materić, Mike Peacock, Matthew Kent, Sarah Cook, Vincent Gauci, Thomas Röckmann and Rupert Holzinger

Table S3. Ions that showed strong significant difference between peat swamp forest oil palm plantation (SOP) and the surrounding natural forest buffer zones in Sarawak, Malaysian Borneo (SI)

| m/z     | Chemical formula | mean SI     | mean SOP      | p value | t value |
|---------|------------------|-------------|---------------|---------|---------|
| 41.039  | C3H4H+           | <b>2.17</b> | 1.24          | 1.0E-07 | 7.4     |
| 45.014  | ?                | 0.00        | <b>2.72</b>   | 1.7E-04 | -4.8    |
| 51.995  | ?                | 0.01        | <b>0.20</b>   | 3.4E-09 | -8.9    |
| 62.028  | ?                | 1.64        | <b>37.99</b>  | 3.6E-04 | -4.4    |
| 63.024  | DMS + ?          | 2.55        | <b>117.55</b> | 1.2E-04 | -4.9    |
| 64.031  | ?                | 0.03        | <b>0.57</b>   | 6.5E-04 | -4.1    |
| 70.072  | ?                | <b>0.19</b> | 0.13          | 8.3E-06 | 5.6     |
| 71.049  | C4H6OH+          | <b>1.28</b> | 0.53          | 3.8E-04 | 4.1     |
| 71.085  | C5H10H+          | <b>0.15</b> | 0.06          | 2.0E-04 | 4.4     |
| 75.043  | C3H6O2H+         | <b>2.14</b> | 0.31          | 1.9E-05 | 5.3     |
| 80.038  | C4H3N2H+         | 0.31        | <b>18.51</b>  | 5.6E-04 | -4.2    |
| 81.035  | C5H4OH+          | 1.27        | <b>69.33</b>  | 3.7E-04 | -4.4    |
| 85.064  | C5H8OH+          | <b>0.79</b> | 0.41          | 1.2E-04 | 4.6     |
| 87.044  | C4H6O2H+         | <b>2.83</b> | 0.96          | 2.9E-04 | 4.2     |
| 89.058  | C4H8O2H+         | <b>2.35</b> | 0.38          | 1.2E-04 | 4.5     |
| 95.018  | C5H2O2H+         | <b>0.22</b> | 0.01          | 1.6E-04 | 4.4     |
| 97.1    | C7H12H+          | <b>0.43</b> | 0.19          | 4.5E-05 | 4.9     |
| 99.079  | C6H10OH+         | <b>0.58</b> | 0.31          | 6.7E-06 | 5.7     |
| 103.073 | C5H10O2H+        | <b>1.12</b> | 0.23          | 2.9E-04 | 4.2     |
| 109.065 | C5H10O2H+        | <b>0.20</b> | 0.08          | 4.0E-09 | 8.8     |
| 111.079 | C5H10O2H+        | <b>0.31</b> | 0.16          | 3.4E-05 | 5.0     |
| 117.089 | C6H12O2H+        | <b>0.57</b> | 0.14          | 1.8E-04 | 4.4     |
| 121.064 | C8H8OH+          | <b>0.36</b> | 0.15          | 6.4E-09 | 8.6     |
| 125.094 | C8H12OH+         | <b>0.43</b> | 0.24          | 2.9E-05 | 5.1     |
| 127.074 | C7H10O2H+        | <b>0.34</b> | 0.22          | 4.1E-05 | 5.0     |
| 127.108 | C8H14OH+         | <b>0.28</b> | 0.18          | 2.2E-05 | 5.2     |
| 139.074 | C8H10O2H+        | <b>0.74</b> | 0.28          | 4.2E-04 | 4.1     |
| 153.089 | C9H12O2H+        | <b>0.35</b> | 0.23          | 1.9E-04 | 4.4     |
| 179.105 | C11H14O2H+       | <b>0.26</b> | 0.16          | 1.5E-04 | 4.5     |
| 191.126 | C9H18O4H+        | <b>0.27</b> | 0.10          | 6.8E-05 | 4.8     |
| 197.144 | C12H20O2H+       | <b>0.28</b> | 0.12          | 1.6E-04 | 4.4     |
| 209.142 | C9H20O5H+        | <b>0.21</b> | 0.12          | 7.0E-08 | 7.5     |
| 211.156 | C9H22O5H+        | <b>0.10</b> | 0.06          | 4.8E-04 | 4.0     |
| 223.104 | C16H14OH+        | <b>0.15</b> | 0.09          | 3.3E-04 | 4.2     |
| 235.156 | C11H22O5H+       | <b>0.13</b> | 0.08          | 2.6E-05 | 5.1     |

# Characterisation of the semi-volatile component of Dissolved Organic Matter by Thermal Desorption – Proton Transfer Reaction – Mass Spectrometry

Dušan Materić, Mike Peacock, Matthew Kent, Sarah Cook, Vincent Gauci, Thomas Röckmann and Rupert Holzinger

Figure S1. A picture of vials loaded with filtered samples of various color.

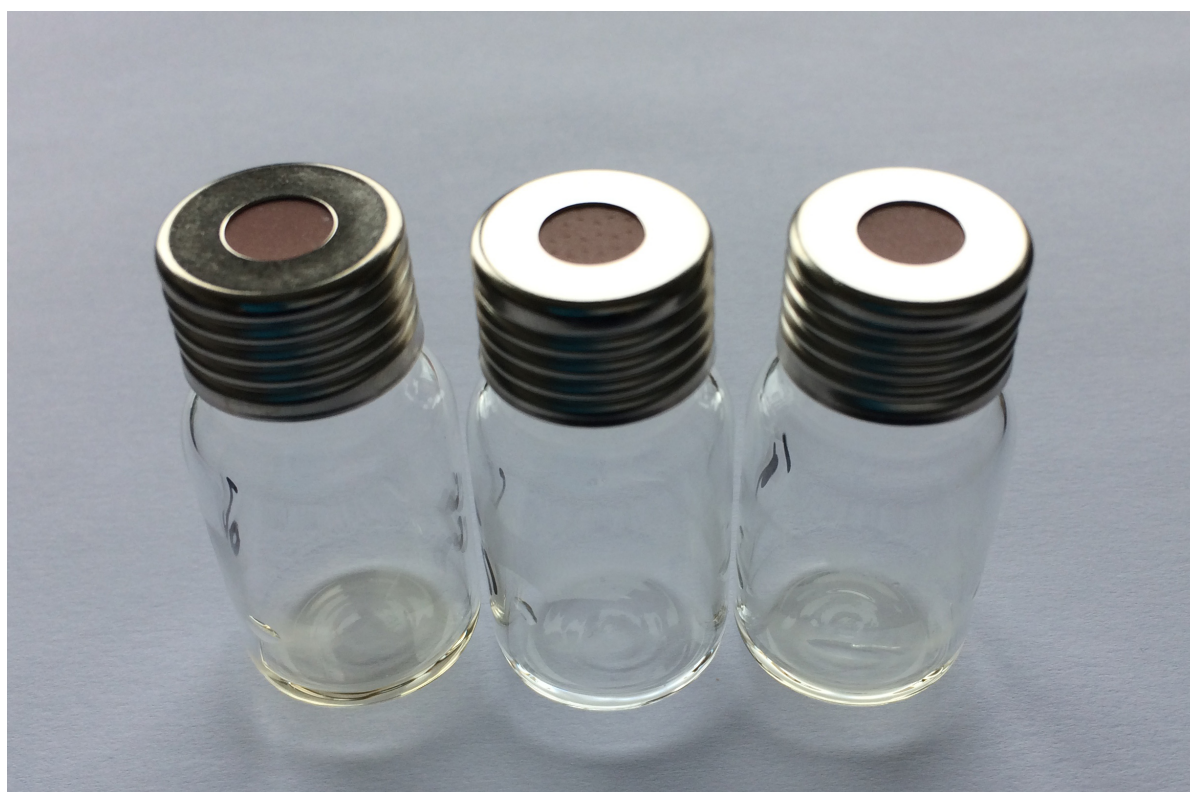

# Characterisation of the semi-volatile component of Dissolved Organic Matter by Thermal Desorption – Proton Transfer Reaction – Mass Spectrometry

Dušan Materić, Mike Peacock, Matthew Kent, Sarah Cook, Vincent Gauci, Thomas Röckmann and Rupert Holzinger

Figure S2. (a, b) PCA plots of PTR-MS data, when Sarawak intact samples taken after drought-like condition were separated into a subgroup (SIs). (c, d, e) boxplot of ions associated with drought-like conditions.

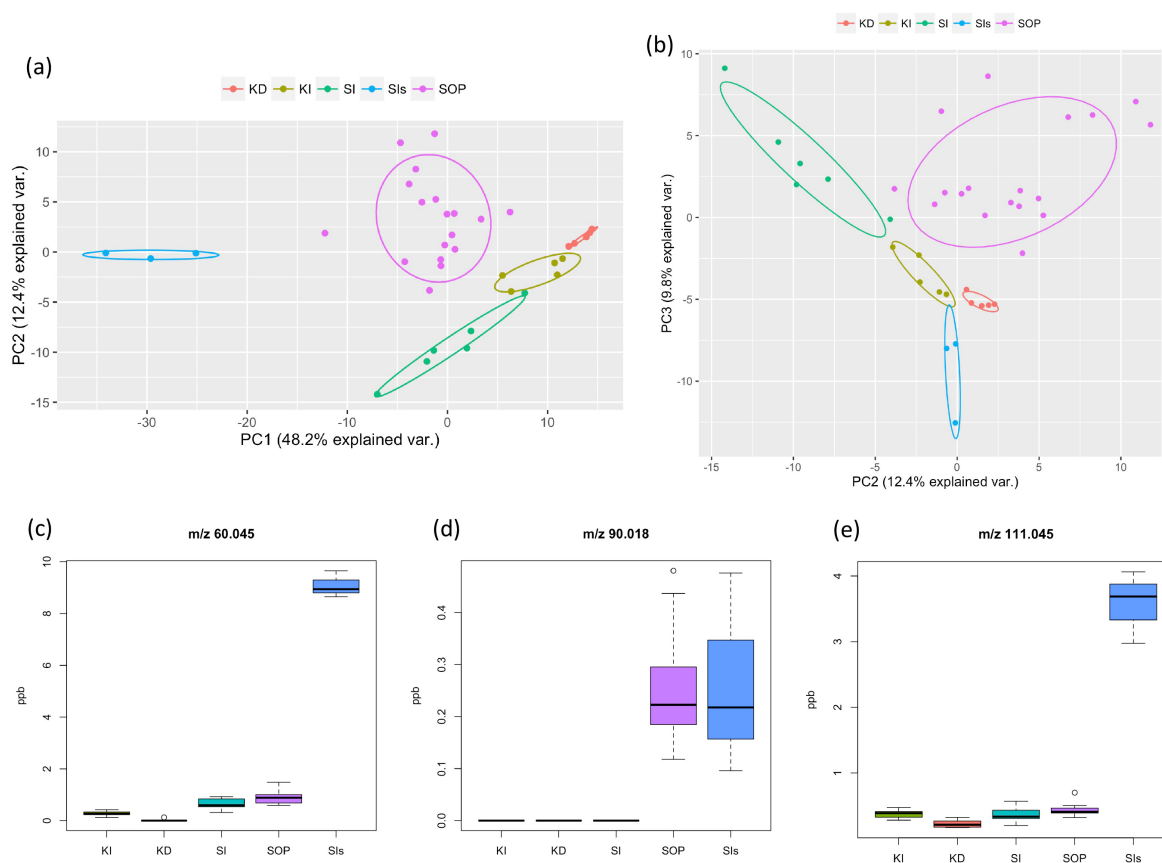

Supplement: 41598_2017_16256_MOESM1_ESM.pdf [file 41598_2017_16256_MOESM1_ESM.pdf]
